# Supplementary material for: Targeting Nanomaterials to Head and Neck Cancer Cells Using a Fragment of the Shiga Toxin as a Potent Natural Ligand
Source: MDPI journal article supplement (doi:10.3390/cancers13194920), 2021-09-30
Supplement: s1 [file s1]

# Supplementary Materials: Targeting Nanomaterials to Head and Neck Cancer Cells using A Fragment of the Shiga Toxin as A Potent Natural Ligand

Elena Navarro-Palomares <sup>1</sup>, Lorena García-Hevia <sup>1,\*</sup>, Esperanza Padín-González <sup>1</sup>, Manuel Bañobre-López <sup>2</sup>, Juan C. Villegas <sup>1</sup>, Rafael Valiente <sup>1</sup> and Mónica L. Fanarraga <sup>1,\*</sup>

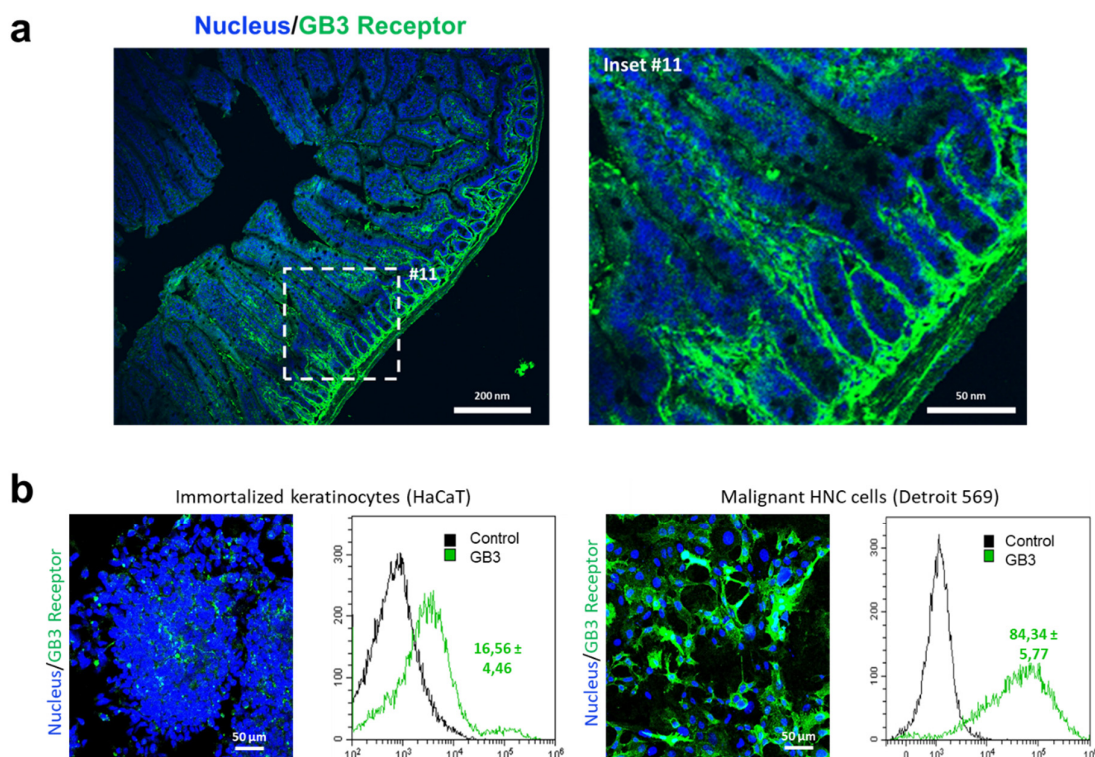

**Figure S1.** (a) Confocal microscopy image of a mouse intestine cryosection immunostained for the GB3 membrane receptor (green channel). Nuclei are stained with Hoechst (blue channel). Confocal images are pseudo-colored. (b) Human precancerous (Immortalized keratinocytes, HaCaT) and HNC cells (Detroit 569) immunostained for the GB3 receptor (green channel). The morphology of the HNC cells in culture shows a mesenchymal shape. Graphs on the right show the quantification of GB3 expression in a total of 10.000 cells by flow cytometry. GB3 positive cells represent ca. 16% in HaCat keratinocytes compared to ca. 84% in HNC Detroit 569 cells.

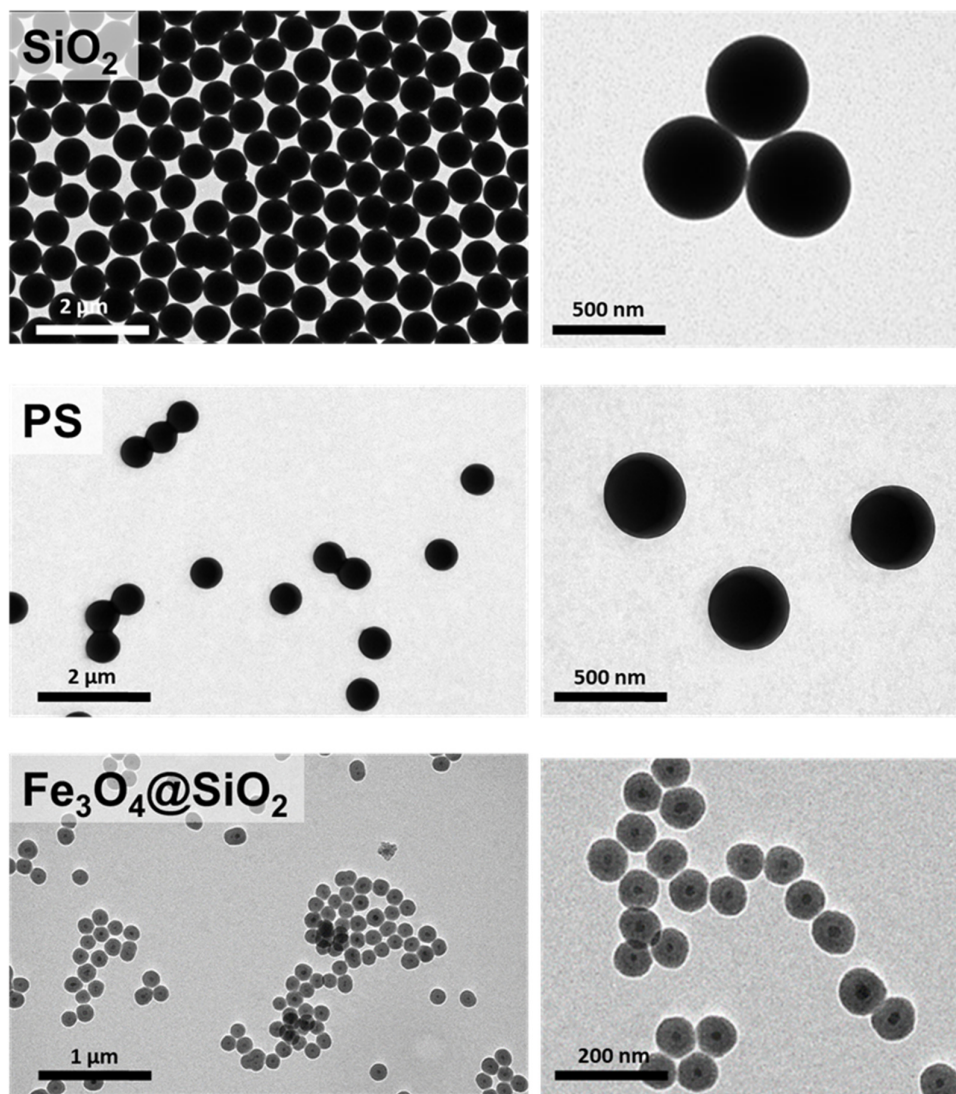

**Figure S2.** Transmission Electron Microscopy images of the nanoparticles used in the study. See Methods section of nanoparticle characterization.

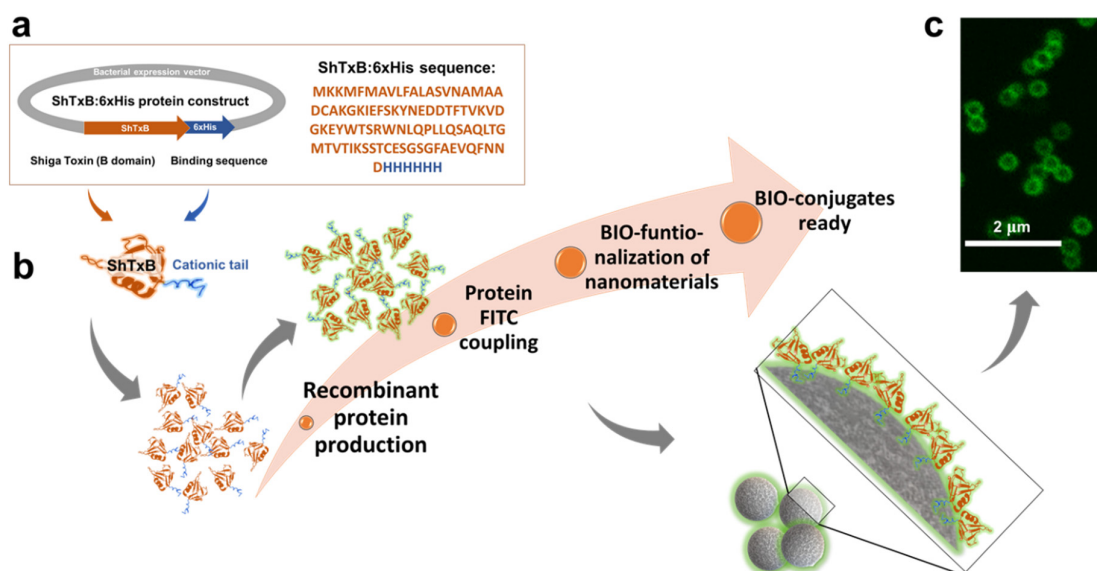

**Figure S3.** Ligand-protein production and nanomaterial functionalization procedure.

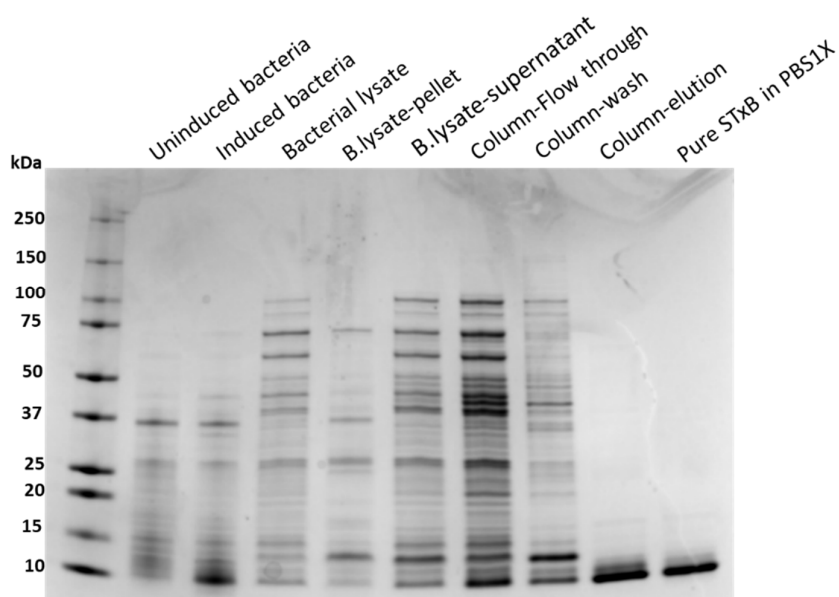

**Figure S4.** Coomassie-blue stained SDS-PAGE electrophoresis gel showing the different fractions of proteins obtained during the overexpression and purification steps of the StxB:6xHis protein (ShTxB).

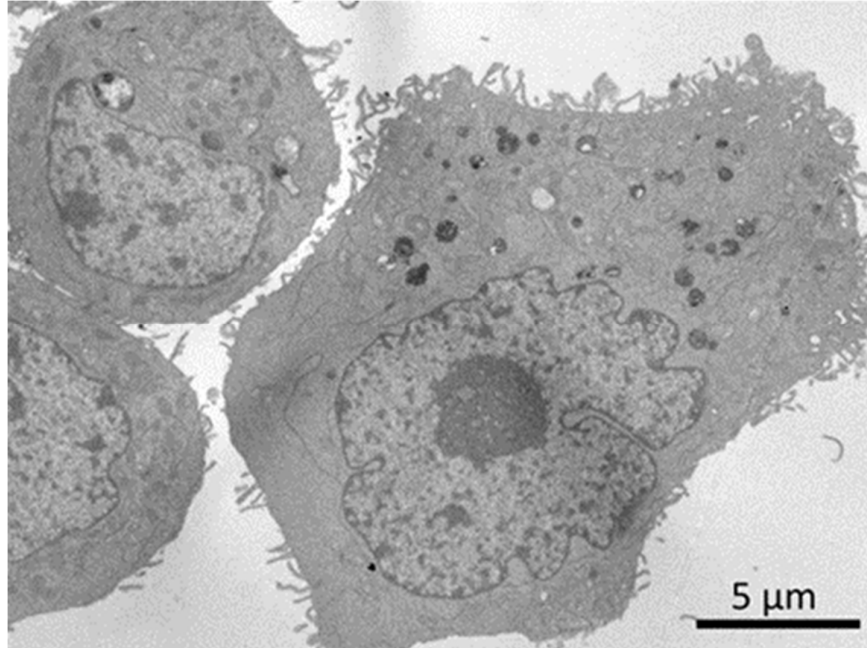

**Figure S5.** Transmission Electron Microscopy image of an ultrathin section of a control human HNC cell.
